# Supplementary material for: Construction of MWNT supported ultra-small Ag@MnO2 nanoparticles for the ORR and Al–air batteries
Source: Royal Society of Chemistry journal article supplement (doi:10.1039/d3se00337j), 2023-01-01
Supplement: d3se00337j1.pdf [file d3se00337j1.pdf]

**Supporting Information**

**Construction of MWNTs supported ultra-small Ag@MnO<sub>2</sub> nanoparticle  
for ORR and Al-air battery**

**Supplementary Figures**

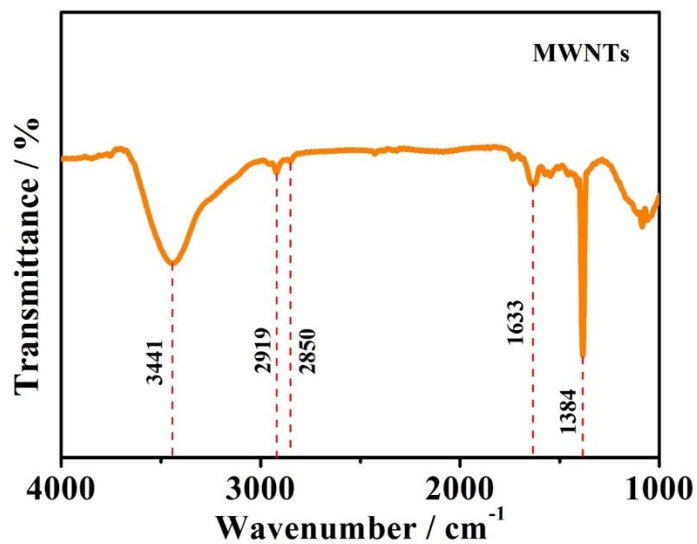

Fig. S1 FTIR of pretreated MWNTs

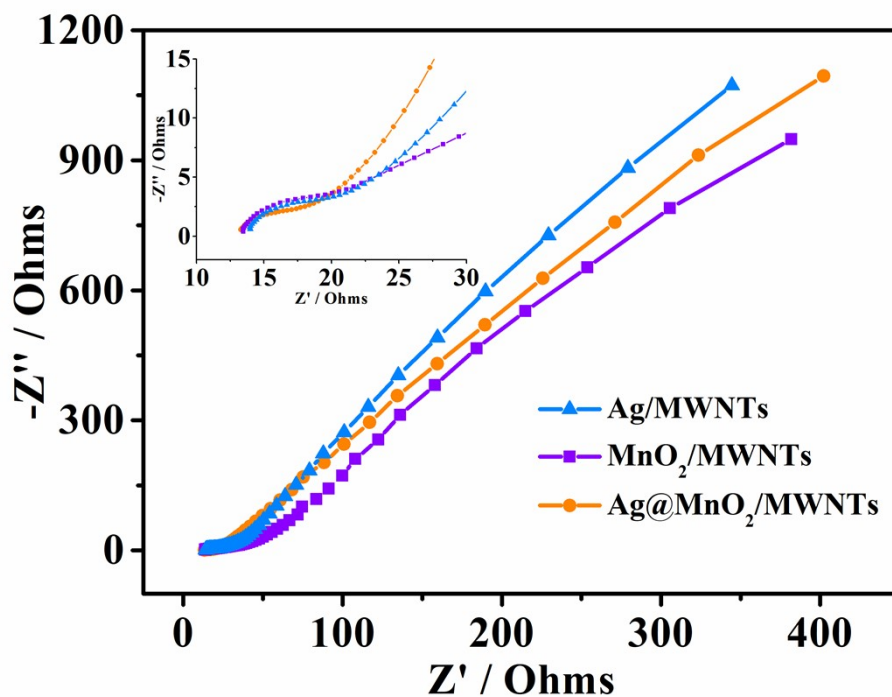

Fig. S2 EIS of Ag/MWNTs, MnO<sub>2</sub>/MWNTs, and Ag@MnO<sub>2</sub>/MWNTs catalysts

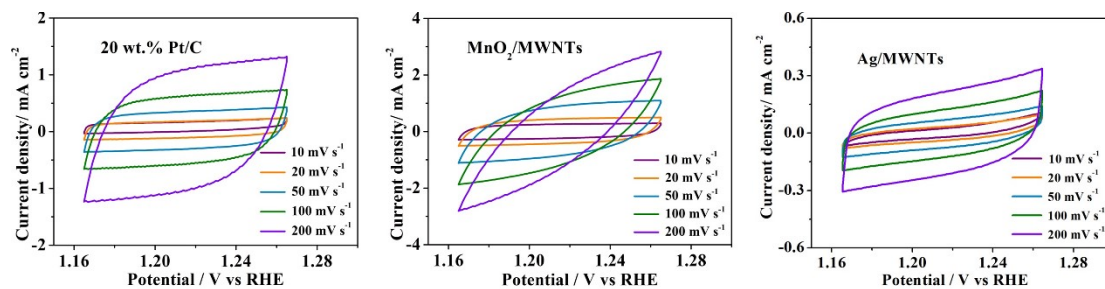

Fig. S3 CV curves of 20 wt% Pt/C, Ag/MWNTs, and MnO<sub>2</sub>/MWNTs in N<sub>2</sub>-saturated 0.1 M KOH solution

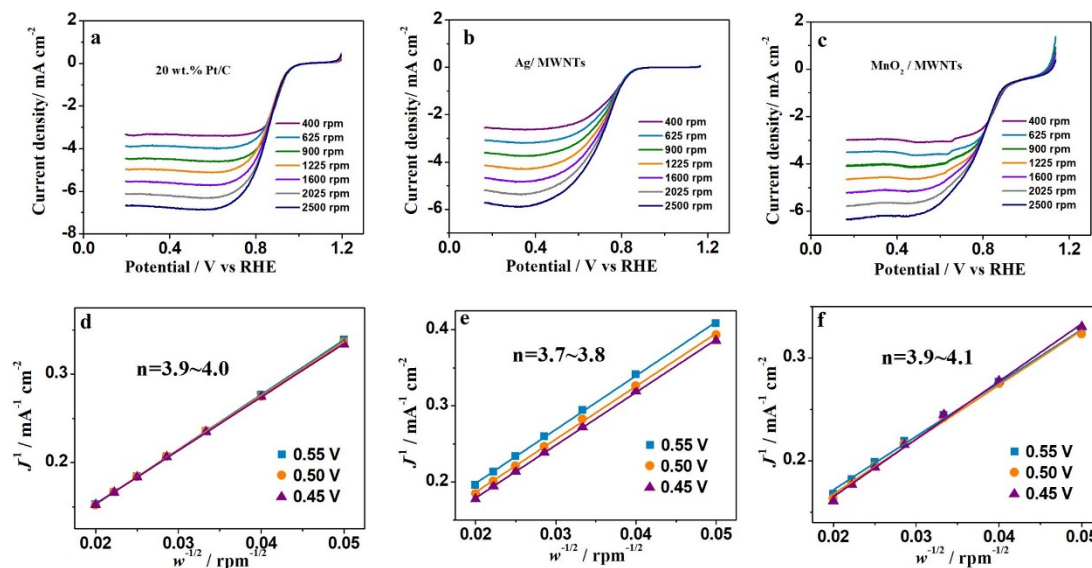

Fig. S4 RDE polarization curves for 20 wt%Pt/C(a), Ag/MWNTs(b), MnO<sub>2</sub>/MWNTs(c), K-L curves for 20 wt%Pt/C(d), Ag/MWNTs(e), MnO<sub>2</sub>/MWNTs(f).

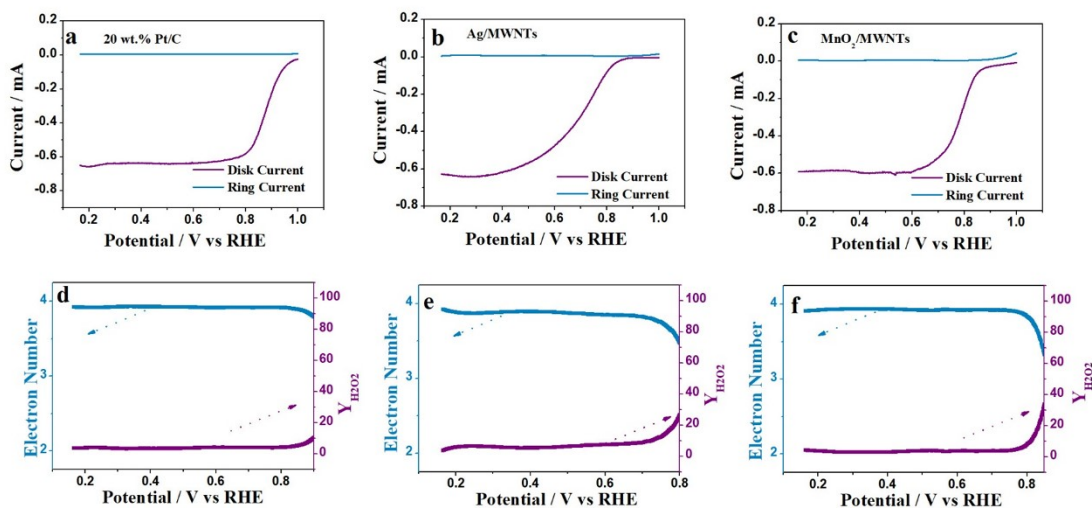

Fig. S5 20wt %Pt/C, Ag/MWNTs, MnO<sub>2</sub>/MWNTs (a, b, c) RRD polarization curves, electron transfer numbers and H<sub>2</sub>O<sub>2</sub> yield curves (d, e, f)
